# Supplementary material for: Native proline-rich motifs exploit sequence context to target actin-remodeling Ena/VASP protein ENAH
Source: eLife. 2022 Jan 25;11:e70680. doi: 10.7554/eLife.70680 (PMC8789275; doi:10.7554/eLife.70680)
Supplement: Figure 3—source data 1. [file elife-70680-fig3-data1.xlsx]

## Sheet: Read Me
Raw data for figure 3 in Native proline-rich motifs exploit sequence context to target actin-remodeling Ena/VASP protein ENAH
Two separate BLI experiments were performed, and steady state analysis was performed for each curve at a given concentration of ENAH EVH1 to obtain values to fit a one-site specific to binding model in Prism to obtain KD's.
Steady state values are reported as the wavelength shift (response, nm) of the BLI experiment.
Data in figure 3B and 3C is the fold change in KD between two different conditions. Error for fold change is calculated through error propagation:
Raw data in Figure 3B and 3C show both the steady state values used to fit binding curves for given conditions, as well as Fold Change and Error raw values shown in bar plots of figures 3B and 3C
Fold Change	Error
Values for mean and standard deviation of KD's are given in format below:
AVERAGE	STD DEV
Additional details on BLI data collection and steady state analysis can be found in co-submission manuscript A distributed residue network permits conformational binding specificity in a conserved family of actin remodelers

## Sheet: Figure 3B
	LPP						NHSL1
Concentration (μM)	FP4 1			FP4 2			FP4 1			FP4 2
	Rep 1	Rep 2	Rep 3	Rep 1	Rep 2	Rep 3	Rep 1	Rep 2	Rep 3	Rep 1	Rep 2	Rep 3
80	0.9618	0.7067	0.3545	0.5487	0.456	0.2434	0.4606	0.3846	0.2434	0.5613	0.4254	0.3054
60	0.8913	0.659	0.323	0.516	0.4324	0.2209	0.3942	0.3103	0.239	0.5213	0.3928	0.3069
30	0.7349	0.5292	0.2639	0.3784	0.3055	0.167	0.274	0.2392	0.1578	0.3951	0.3045	0.2191
15	0.5747	0.433	0.1953	0.2588	0.2217	0.1112	0.1728	0.1504	0.1035	0.2817	0.2103	0.1453
7.5	0.4095	0.3042	0.1326	0.162	0.1264	0.06599	0.09789	0.07945	0.05902	0.1788	0.1267	0.1025
3.75	0.2763	0.1867	0.08827	0.09364	0.07564	0.03408	0.05061	0.04029	0.03424	0.1059	0.07322	0.05731
1.875	0.1733	0.1195	0.03613	0.04968	0.04016	0.004359	0.01979	0.01553	0.006797	0.05227	0.03504	0.02213
0	0	0	0	0	0	0	0	0	0	0	0	0.009104
KD (μM)	12.25	12.63	16.69	27.65	28.88	32.12	51.46	45.83	40.43	23.54	25.22	25.79
Average and SD	13.8567	2.46108		29.55	2.30909		45.9067	5.5154		24.85	1.16974
95% Confidence Interval	[7.8, 20.0]			[23.8, 35.3]			[32.2, 59.6]			[21.9, 27.8]
	Fold Change of FP4 truncation KD's relative to 36-mer LPP and NHSL1 KD's:
	LPP:					NHSL1:
	FP4 1		FP4 2
	2.94	0.545	6.26	0.521		4.72	0.277	2.55	0.258

## Sheet: Figure 3C
PCARE
	WT ENAH EVH1			ENAH R47A EVH1
Concentration (μM)	Rep 1	Rep 2	Rep 3	Rep 1	Rep 2	Rep 3
5	0.4593	0.3648	0.312766	0.3606	0.3066	0.323637
2.5	0.4213	0.3424	0.298048	0.3224	0.2769	0.301675
1.25	0.3804	0.3144	0.283249	0.2834	0.2514	0.274644
0.625	0.3302	0.2831	0.26018	0.2315	0.206	0.227521
0.3125	0.2634	0.2285	0.211294	0.166	0.1562	0.165913
0.15625	0.1948	0.1807	0.160427	0.1108	0.1102	0.112453
0.078	0.1266	0.1222	0.114599	0.07768	0.07652	0.0744
0.039	0.07649	0.08217	0.071047	0.05097	0.05052	0.040408
0.019	0.04319	0.04428	0.042512	0.02145	0.02114	0.02468
0.0095	0.02179	0.02274	0.024899	0.01179	0.01368	0.009286
0.00475	0.008348	0.01086	0.017583	0.004071	0.008235	0.009021
0	0	0	0	0	0	0
KD (μM)	0.2238	0.1611	0.1431	0.3719	0.29	0.3118
Average and SD	0.176	0.0423631		0.324567	0.0424163
95% Confidence Interval	[0.12463, 0.32337]			[0.22563, 0.42437]
	WT ENAH EVH1														ENAH R47A EVH1
Concentration (μM)	LPP			NHSL1			Zyx			ActA				Concentration (μM)	LPP			NHSL1				Zyx			ActA
	Rep 1	Rep 2	Rep 3	Rep 1	Rep 2	Rep 3	Rep 1	Rep 2	Rep 3	Rep 1	Rep 2	Rep 3			Rep 1	Rep 2	Rep 3	Rep 1	Rep 2	Rep 3*	Rep 4	Rep 1	Rep 2	Rep 3	Rep 1	Rep 2	Rep 3
80	0.3487	0.4375		0.5123	0.4972		0.5098	0.4832	0.649453	0.438	0.4061			80	0.3758	0.4229	0.42	0.3516	0.3891	0.3109	0.468865	0.4318	0.4841	0.538085	0.5428	0.5352	0.2513
53.33	0.3287	0.4068		0.4581	0.4556		0.4598	0.4429	0.587781	0.4294	0.3833			60	0.3233	0.365	0.3491	0.2949	0.3429	0.3026	0.406464	0.3758	0.4332	0.488353	0.5106	0.5079	0.2428
35.56	0.308	0.3831		0.42	0.4163		0.4243	0.4167	0.533202	0.3964	0.3627			30	0.2107	0.2419	0.2458	0.1987	0.2272	0.2065	0.269729	0.2813	0.3257	0.36664	0.4518	0.4399	0.2334
23.7	0.2829	0.3632		0.3718	0.3807		0.3864	0.3864	0.482554	0.3709	0.3414			15	0.125	0.1487	0.1419	0.1207	0.1396	0.1359	0.165394	0.1922	0.2275	0.256235	0.3634	0.3545	0.225
15.8	0.2475	0.3319		0.3101	0.3336		0.3452	0.3536	0.433819	0.336	0.3101			7.5	0.07279	0.08616	0.09284	0.06481	0.08138	0.0794	0.09361	0.12	0.1497	0.16399	0.2726	0.273	0.1834
10.53	0.2197	0.3003		0.2715	0.2908		0.3094	0.3275	0.38572	0.301	0.2721			3.75	0.03669	0.04759	0.04974	0.06875	0.04493	0.04269	0.05376	0.07542	0.08989	0.097414	0.204	0.1933	0.1287
7.022	0.1904	0.2649		0.2373	0.2511		0.2789	0.2969	0.338918	0.2602	0.2352			1.875	0.02041	0.02676	0.03772	0.02096	0.02103	0.03498	0.031191	0.03255	0.04508	0.055796	0.1297	0.1211	0.07525
4.68	0.1665	0.2354		0.2037	0.2155		0.2485	0.2622	0.292461	0.224	0.2037			0	0	0	0	0	0	0	0	0	0	0	0	0	0
3.12	0.127	0.2948		0.1295	0.1646		0.1817	0.2102	0.25193	0.1801	0.1514
2.08	0.09506	0.2339		0.09987	0.1291		0.1467	0.1766	0.204391	0.141	0.1276			KD (μM)	67.46	58.69	54.26	56.52	56.77	34.2	58.33	30.26	25.83	25.7	7.839	8.199	3.852
1.39	0.07632	0.1882		0.07407	0.1003		0.115	0.1443	0.174992	0.1029	0.09511			Average and SD	60.1367	6.71786		57.2067	0.980833			27.2633	2.596		6.63	2.41254
0	0	0		0	0		0	0	0	0	0			95% Confidence Interval	[43.5, 76.7]			[54.8, 59.6]				[20.8, 33.7]			[0.7, 12.6]
80			0.4934			0.4863						0.301
60			0.4768			0.4211						0.3631
30			0.4633			0.3604						0.2956
15			0.3369			0.2768						0.274			*Note that this data set was not used to calculate the average KD nor fold change as it is an outlier. However, including this dataset does not change the significance of the two-tailed t test used in this study
7.5			0.2988			0.2148						0.2199
3.75			0.2088			0.1325						0.162
1.875			0.1311			0.08329						0.1011
0			0			0						0
KD (μM)	6.154	1.909	6.093	9.972	7.143	12.07	5.709	3.871	5.499	5.087	5.323	4.405
Average and SD	4.71867	2.43343		9.72833	2.47252		5.02633	1.00604		4.93833	0.476715
95% Confidence Interval	[0, 10.7]			[3.5, 15.9]			[2.5, 7.5]			[3.7, 6.1]
		Fold Change of KD's of ENAH WT EVH1 vs. ENAH EVH1 R47A against given peptides
		LPP		Zyx		NHSL1		PCARE		ActA
		12.73	0.527	5.42	0.221	5.88	0.248	1.84	0.274	1.34	0.376
