# Supplementary material for: Native proline-rich motifs exploit sequence context to target actin-remodeling Ena/VASP protein ENAH
Source: eLife. 2022 Jan 25;11:e70680. doi: 10.7554/eLife.70680 (PMC8789275; doi:10.7554/eLife.70680)
Supplement: Source data 1. [file elife-70680-supp9.xlsx]

## Sheet: Read Me
Raw data for Supplementary File 2 in Native proline-rich motifs exploit sequence context to target actin-remodeling Ena/VASP protein ENAH
2-3 separate BLI experiments were performed, and steady state analysis was performed for each curve at a given concentration of ENAH EVH1 to obtain values to fit a one-site specific to binding model in Prism to obtain KD's.
Steady state values are reported as the wavelength shift (response, nm) of the BLI experiment. Data in table is reported as the average KD and standard deviation
Additional details on BLI data collection and steady state analysis can be found in co-submission manuscript A distributed residue network permits conformational binding specificity in a conserved family of actin remodelers
Values for mean and standard deviation of KD's are given in format below:
AVERAGE	STD DEV

## Sheet: Supplement File 2
ENAH EVH1 WT against PCARE, NHSL1, LPP, ZYX, and ActA can be found in Source Data- Table 1
Concentration (μM)	ABI1
	Rep 1	Rep 2	Rep 3
80	0.5175	0.5746	0.706307
53.33	0.4836	0.5503	0.675052
35.56	0.4598	0.5284	0.634468
23.7	0.4331	0.5042	0.592816
15.8	0.3883	0.4675	0.55199
10.53	0.3583	0.4289	0.498432
7.022	0.3237	0.3932	0.455251
4.68	0.2937	0.3601	0.402692
3.12	0.3167	0.2903	0.365014
2.08	0.2652	0.2444	0.305976
1.39	0.2499	0.2062	0.256112
0	0	0	0
KD (μM)	1.924	2.926	3.015
Average and SD	2.62167	0.605834
95% Confidence Interval	[1.1, 4.1]
Concentration (μM)	SHROOM3		ABI3		KIAA1522			FBLIM1		TNK2		TJAP1			FYB1		NUTM2E		FHOD1		SYNPO2		TENM1
	Rep 1	Rep 2	Rep 1	Rep 2	Rep 1	Rep 2	Rep 3	Rep 1	Rep 2	Rep 1	Rep 2	Rep 1	Rep 2	Rep 3	Rep 1	Rep 2	Rep 1	Rep 2	Rep 1	Rep 2	Rep 1	Rep 2	Rep 1	Rep 2
80	0.4892	0.5369	1.041	1.26	0.38	0.4455	0.31251	0.2849	0.3772	0.5677	0.6213	0.4495	0.5707	0.511472	0.7741	0.7403	0.3289	0.3365	0.359	0.3633	0.2856	0.2927	0.1393	0.1504
60	0.4594	0.5241	0.9401	1.17	0.3508	0.4288	0.293041	0.2662	0.3537	0.5036	0.5606	0.4165	0.52	0.471151	0.7006	0.6639	0.2875	0.2957	0.3249	0.3153	0.2512	0.2554	0.1193	0.1255
30	0.3875	0.4403	0.752	0.9236	0.291	0.3499	0.239687	0.2105	0.2789	0.3963	0.4336	0.3118	0.3977	0.36426	0.5258	0.4998	0.2048	0.2044	0.2265	0.2037	0.1679	0.163	0.07665	0.07664
15	0.3159	0.3576	0.5785	0.7141	0.215	0.266	0.182238	0.1545	0.2118	0.2807	0.3166	0.2244	0.2824	0.257915	0.3656	0.3577	0.1434	0.1388	0.1368	0.1272	0.1067	0.1051	0.04936	0.0497
7.5	0.2353	0.2605	0.4198	0.5227	0.1549	0.1866	0.1261	0.1085	0.1436	0.1897	0.2086	0.1412	0.1789	0.163822	0.2403	0.2323	0.08545	0.09086	0.08067	0.07809	0.0643	0.06465	0.03101	0.02948
3.25	0.162	0.1802	0.2926	0.3584	0.09984	0.1158	0.079507	0.07103	0.09453	0.1169	0.1265	0.08227	0.1055	0.096358	0.15	0.1464	0.05422	0.0594	0.048	0.04935	0.03747	0.03812	0.02035	0.02058
1.625	0.1057	0.115	0.1872	0.2233	0.05814	0.06866	0.047536	0.04537	0.05779	0.06537	0.07179	0.04757	0.05951	0.053136	0.09299	0.08885	0.03931	0.04047	0.03199	0.02972	0.02553	0.02377	0.01559	0.01496
0	0	0	0	0	0	0	0	0	0	0	0	0	0	0	0	0	0	0	0	0	0	0	0	0
KD (μM)	8.602	8.638	12.97	12.69	13.48	13.02	13.61	15.51	15.09	20.64	20.3	22	24.06	23.08	32.28	34.09	43.33	34.09	43.33	55.91	47.84	54.7	53.41	71.17
Average and SD	8.62	0.0254558	12.83	0.19799	13.37	0.31		15.3	0.296985	20.47	0.240416	23.0467	1.0304		33.185	1.27986	38.71	6.53367	49.62	8.8954	51.27	4.85075	62.29	12.5582
95% Confidence Interval	[8.4 , 8.8]		[11.1 , 14.6]		[12.6, 14.1]			[12.6, 18.0]		[18.3, 22.6]		[20.5 , 25.6]			[21.7 , 44.7]		[0 , 97.1]		[0 , 129.6]		[7.7 , 94.8]		[0 , 175.1]
