# Supplementary material for: Native proline-rich motifs exploit sequence context to target actin-remodeling Ena/VASP protein ENAH
Source: eLife. 2022 Jan 25;11:e70680. doi: 10.7554/eLife.70680 (PMC8789275; doi:10.7554/eLife.70680)
Supplement: Source data 2. [file elife-70680-supp10.xlsx]

## Sheet: Read Me
Raw data for Supplement File 3 in Native proline-rich motifs exploit sequence context to target actin-remodeling Ena/VASP protein ENAH
2-4 separate BLI experiments were performed, and steady state analysis was performed for each curve at a given concentration of ENAH EVH1 to obtain values to fit a one-site specific to binding model in Prism to obtain KD's.
Steady state values are reported as the wavelength shift (response, nm) of the BLI experiment. Data in tables is reported as the average KD and standard deviation
Additional details on BLI data collection and steady state analysis can be found in co-submission manuscript A distributed residue network permits conformational binding specificity in a conserved family of actin remodelers
Values for mean and standard deviation of KD's are given in format below:
AVERAGE	STD DEV

## Sheet: Supplement File 3
ENAH EVH1 WT against ABI1 can be found in Source Data- Supplementary File 2
Concentration (μM)	ABI1 A		ABI1 B		ABI1 ala
	Rep 1	Rep 2	Rep 1	Rep 2	Rep 1	Rep 2
80	0.6453	0.5859	0.6298	0.5274	0.4828	0.4338
53.33	0.6099	0.5519	0.5987	0.4695	0.4492	0.4271
35.56	0.5802	0.5512	0.5546	0.4622	0.4183	0.3926
23.7	0.532	0.4955	0.5206	0.4446	0.3825	0.3494
15.8	0.5022	0.4289	0.4736	0.4334	0.3353	0.284
10.53	0.4559	0.3889	0.4236	0.4012	0.2871	0.2533
7.022	0.4008	0.3433	0.3594	0.3438	0.2368	0.2117
4.68	0.3514	0.3055	0.3305	0.288	0.1988	0.1673
3.12	0.2794	0.2468	0.2624	0.2533	0.151	0.1374
2.08	0.2481	0.2032	0.2238	0.2099	0.1185	0.09886
1.39	0.1922	0.1668	0.1776	0.1609	0.09023	0.07524
0	0	0	0	0	0	0
KD (μM)	3.933	4.689	4.538	3.304	7.864	9.067
Average and SD	4.311	0.534573	3.921	0.87257	8.4655	0.850649
95% Confidence Interval	[0, 9.1]		[0 , 11.7]		[0.82 , 16.1]
	FDDFP8			FP8			FP4S4
Concentration (μM)	Rep 1	Rep 2	Rep 3	Rep 1	Rep 2	Rep 3	Rep 1	Rep 2	Rep 3*	Rep 4
80	0.4763	0.4916	0.409137	0.3041	0.3322	0.288576	0.2164	0.2124	0.309701	0.199515
60	0.4627	0.4576	0.3905	0.3211	0.2953	0.263555	0.1852	0.1793	0.263146	0.167734
30	0.3729	0.3929	0.331892	0.2303	0.2183	0.189876	0.1113	0.1072	0.164256	0.103645
15	0.3052	0.3065	0.268739	0.1566	0.1441	0.13075	0.06195	0.06244	0.100456	0.05999
7.5	0.2243	0.2206	0.200913	0.09955	0.08686	0.08397	0.03266	0.03623	0.059908	0.030415
3.75	0.1621	0.1636	0.144738	0.06257	0.0473	0.056068	0.01777	0	0.04137	0.014693
1.875	0.09488	0.09969	0.097333	0.0403	0.02067	0.03213	0.0007932	0	0.030371	0.00453
0	0	0	0	0	0	0	0	0	0	0
KD (μM)	9.921	10.16	8.555	22.77	34.21	28.1	109.5	119.2	69.68	100.9
Average and SD	9.54533	0.865939		28.36	5.72443		109.867	9.15551
95% Confidence Interval	[7.4 , 11.7]			[14.2 , 42.6]			[87.1 , 132.7]
	*replicate omitted because it is an outlier. However, inclusion of this replicate does not change any statististically significant conclusions.
