# Supplementary material for: Native proline-rich motifs exploit sequence context to target actin-remodeling Ena/VASP protein ENAH
Source: eLife. 2022 Jan 25;11:e70680. doi: 10.7554/eLife.70680 (PMC8789275; doi:10.7554/eLife.70680)
Supplement: Source data 3. [file elife-70680-supp11.xlsx]

## Sheet: Read Me
Raw data for Supplement File 4 in Native proline-rich motifs exploit sequence context to target actin-remodeling Ena/VASP protein ENAH
Three separate BLI experiments were performed, and steady state analysis was performed for each curve at a given concentration of ENAH EVH1 to obtain values to fit a one-site specific to binding model in Prism to obtain KD's.
Steady state values are reported as the wavelength shift (response, nm) of the BLI experiment. Data in tables is reported as the average KD and standard deviation
Additional details on BLI data collection and steady state analysis can be found in co-submission manuscript A distributed residue network permits conformational binding specificity in a conserved family of actin remodelers
Values for mean and standard deviation of KD's are given in format below:
AVERAGE	STD DEV

## Sheet: Supplement File 4
	VASP
	ABI1			LPP			ActA
Concentration (μM)	Rep 1	Rep 2	Rep 3	Rep 1	Rep 2	Rep 3	Rep 1	Rep 2	Rep 3
80	0.3998	0.4204	0.4348	0.3778	0.4168	0.3866	0.3603	0.3406	0.2811
60	0.384	0.3966	0.4148	0.3522	0.3701	0.3771	0.3284	0.321	0.2725
30	0.3016	0.3184	0.3476	0.2832	0.3063	0.2964	0.2809	0.2667	0.2485
15	0.2282	0.2481	0.2375	0.2261	0.2382	0.2245	0.2217	0.2141	0.1941
7.5	0.1682	0.1757	0.1759	0.1565	0.1673	0.1558	0.1564	0.1526	0.1275
3.75	0.108	0.1172	0.1061	0.09258	0.1023	0.1014	0.1071	0.1028	0.08365
1.875	0.06798	0.0715	0.07543	0.05756	0.05723	0.05965	0.06614	0.06344	0.05445
0	0	0	0	0	0	0	0	0	0
KD (μM)	13.95	13.16	15.12	13.95	14.56	14.77	11.29	11.04	10.28
Average and SD	14.0767	0.98612		14.4267	0.42595		10.87	0.526023
95% Confidence Interval	[11.6, 16.6]			[13.3, 15.5]			[9.6, 12.2]
	EVL
	ABI1			LPP			ActA
Concentration (μM)	Rep 1	Rep 2	Rep 3	Rep 1	Rep 2	Rep 3	Rep 1	Rep 2	Rep 3
80	0.4221	0.4344	0.4796	0.4119	0.4158	0.398	0.4265	0.3497	0.3778
60	0.3972	0.405	0.3872	0.3654	0.3513	0.3705	0.4115	0.3853	0.3394
30	0.3315	0.3332	0.3294	0.2626	0.2667	0.2617	0.385	0.3595	0.2908
15	0.2559	0.2562	0.2849	0.1813	0.174	0.19	0.3524	0.3322	0.3101
7.5	0.1837	0.1887	0.199	0.1134	0.1166	0.1152	0.3034	0.2838	0.2592
3.75	0.1186	0.1204	0.1221	0.06019	0.06068	0.0622	0.2395	0.2338	0.2014
1.875	0.07961	0.07261	0.07347	0.03485	0.03457	0.03989	0.1748	0.1609	0.145
0	0	0	0	0	0	0	0	0	0
KD (μM)	12.01	12.64	12.3	32.97	33.01	28.87	2.988	2.498	2.939
Average and SD	12.3167	0.315331		31.6167	2.37877		2.80833	0.269871
95% Confidence Interval	[11.5, 13.1]			[25.6, 37.6]			[2.1, 3.5]
