# Supplementary material for: Native proline-rich motifs exploit sequence context to target actin-remodeling Ena/VASP protein ENAH
Source: eLife. 2022 Jan 25;11:e70680. doi: 10.7554/eLife.70680 (PMC8789275; doi:10.7554/eLife.70680)
Supplement: Supplementary file 1. [file elife-70680-supp1.xlsx]

## Sheet: MassTitr Hits
Gene	Uniprot Accession Number	Uniprot Name	Mapped sequence from proteome	Sequence in library	IUPRED	FP4	CXC		Native proline-rich motifs exploit sequence context to target actin-remodeling Ena/VASP protein ENAH
ZYX	Q15942	ZYX_HUMAN	ALGGAFPPPPPPIEESFPPAPLEEEIFPSPPPPPEE	ALGGAFPPPPPPIEESFPPAPLEEEIFPSPPPPPEE, ALGGAFPPPPPPIEESLPPAPLEEEIFPSPPPPPEE, ALGGAFPPPPPPIEESFPPAPLEEEIFPSPPPLRRS, ALGGAFPPPPPPIEESFPPAPLKEEIFPSPPPPPEE, ALGGAFPPPPPPIDESFPPAPLEEEIFPSPPLLRRS, ALGGALPPPPPPIEESFPPAPLEEEIFPPRRLLRSF	0.899902	X			Hwang et al.
PCARE	A6NGG8	PCARE_HUMAN	AAKSEELSCEMEGNLEHLPPPPMEVLMDKSFASLES	AAKSEELSCEMEGNLEHLPPPPMEVLMDKSFASLES, AAKSEELSCEMEGNLEHLPPPPMEVLMDKSFASWKP, AAKSEELSCEMEGNLEHLPPPPMEVLMDESFASLES	0.695107	X
ZNF669	Q96BR6	ZN669_HUMAN	NLDLNENISTGLKPCECSICGKVFVRHSLLNRHILA	NLDLNQNISTGLKPCACSICGKVFVRHSLFNRHTLA	0.142689		X		Description:		Peptide hits from the MassTitr screen and the representative human protein they map to. High affinity hits are colored in blue.
ABI3	Q9P2A4	ABI3_HUMAN	LSPPPPDEELPLPLDLPPPPPLDGDELGLPPPPPG	LSPPPPDEELPLPLGLPPPPPLDGDELGLPPPPPG	0.900761	X					Sequences that artificially contained an FP4 or CXC motif due to errors in the library but mapped partially to human proteins are colored in yellow.
NFE2	Q16621	NFE2_HUMAN	PPPPTTYCPCSIHPDSGFPLPPPPYELPASTSHVPD	PPPPTTYCPCSIHPDSGFPLPPPPYEPQHPHPMSQH, PPPPTTYCPCSIHPDSGFPLPPPPYELPASTSHVPD, PPPPTTYCPCSIHPDSGFPLPPPPCELPASTSLVPD, PPPPTTYCPCSIHPDSGFPLPPPPYELPASTSHVPE, PPPPTTYCPCSIHPNSGFPLPPPPYELPASTSHVPD, PPPPTAYCPCSIHPDSGFPLPPPPYELPASTSHVPD	0.616585	X
ZNF292	O60281	ZN292_HUMAN	LYNQPDQKYDEENLPIPNSLRCELLL	LYNQPDQKYDEENLPIPNSLRCECYLY, LYNQPDQKYDEENLPIPNSLRCSCYLY	0.24243		X
ABI1	Q8IZP0	ABI1_HUMAN	FDDFPPPPPPPPVDYEDEEAAVVQYNDPYADGDPAW	FDDFPPPPPPPPVDYEDEEAAVVQYNDPYADGDPA, FDDFPPPPPPPPVDYEDEEAAVVQFNDPYADGDPAW, FDDFPPPPPPPPVDYEDEEAAVVQYNDPYADGDPAW, FDDFPPPPPPPPVDYEDEEVQ, FDDFPPPPPPHQWIMKMRRLQ	0.688517	X
LRRC55	Q6ZSA7	LRC55_HUMAN	MGSLQHCCCLLPKMGDTWAQLPWPGPPHPAMLLIS	LMGSLQHCCCLLPKMGDTWAQLPWPGPPHPAMLLIS	0.173538	X	X			High affinity hits
ENAH	Q8N8S7	ENAH_HUMAN	DRLKQDILDEMRKELTKLKEELIDAIRQELSKSNTA	DRLKQDILDEMRKELTKLKEELIDAIRQELSKSNTA	0.584718					Sequences that contained FP4 or CXC motifs in our hits, but do not in the actual protein sequence
LPP	Q93052	LPP_HUMAN	KQPGGEGDFLPPPPPPLDDSSALPSISGNFPPPPPL	KQPGGEGDFLPPPPPPLDDSSALPSISGNFPPPPPL, KQPGGEGDFLPPPPPPLDDSSALPSISSNFPLHHLF	0.852844	X
NLRC5	Q86WI3	NLRC5_HUMAN	LTSFCVCTGPGHQQTGYAFTHLSLQEFLAALHL	LTSFCVCTGPGHQQTGYAFTHLSLQEFLAALPLPPG	0.0887584	X	X
PRCC	Q92733	PRCC_HUMAN	APAFPPPLLLPPPTGDPRLQPPPPLPFGLGGFPPPP	APAFPPPLLLPPPTGDPRLQPPPPLPFGLGGFPPPP, APAFPPPLLLPPPTGDPRLQPPPPLPFDLGGFPPPP, APAFPPPLLLPPPTGDPRFQPPPPLPFGLGGFPPPP, APAFPPPLLLPPPTGDLRLQPPPPLPFGLGGFPPPP	0.873023	X
KIAA1522	Q9P206	K1522_HUMAN	PPAPEEQDLSMADFPPPEEAFFSVASPEPAGPSGSP	PPAPEEQDLSMADFPPPVEAFFSVASPEPAGPSGSP, PPAPEEQDLSMADFPPPEEAFFSVASPEPAGPSGSP, PPAPEEQDLSMADFPPPEEAFFSVASPEPAGLQALH	0.903251
EVL	Q9UI08	EVL_HUMAN	DAFDLDRMKQEILEEVVRELHKVKEEIIDAIRQELS	DAFDLDRMKQEILEEVVRELHKVKEEIIDAIRQELS, DAFDLDRMKQEILEEVVRELHKVKEEIIDAIRQELN	0.531995
NHSL1	Q5SYE7	NHSL1_HUMAN	ADRSPFLPPPPPVTDCSQGSPLPHSPVFPPPPPEAL	ADRSPFLPPPPPVTDCSQGSPLPHSPVFPPPPPEAL, ADRSPFLPPPPPVTGCSQGSPLPHSPVFPPPPPEAL	0.730698	X
DMRTB1	Q96MA1	DMRTB_HUMAN	YYLPPPPPPLPPLPPLPPQPQFLPPGYLSALHFLPP	YYLPPPPPPLPPLPPLPPQPQFLPPGYLSALHFLPP, YYLPPPPPPLPPLPPLPPQPQFLPPGYLSAPHFLPP	0.714954	X
TENM1	Q9UKZ4	TEN1_HUMAN	GSTQDVQSSPHNQFTFRPLPPPPPPPHACTCARKPP	GSTQDVQSSPHNQFTFRPLPPPPPPPHACTCARKPP	0.76658	X	X
ZC3H12A	Q5D1E8	ZC12A_HUMAN	GHFSVPADYPPAPPAFPPREYWSEPYPLPPPTSVLQ	GHFSVPADYPPAPPAFPPREYWSEPYPLPPPTSVLQ	0.547806	X
DMTF1	Q9Y222	DMTF1_HUMAN	TSSISQAELTVDSDIQSSDFPEPPDALEADTFPDEI	TSSISQAELTVDSDIQSSDFPEPPDALEADTFPDEV	0.698538	X
IRF2BPL	Q9H1B7	I2BPL_HUMAN	KHGSGDWRLLGDLLPEAVRFFKEGVPGADMLPQP	KHGSGDWRLLGDLLPEAVRFFKEGVPGADMLPPPPC	0.294113	X
XIRP1	Q702N8	XIRP1_HUMAN	MADTQTQVAPTPTMRMATAEDLPLPPPPALEDLPLP	MADTQTQVAPTPTMRMATAEDLPLPPPPALEDLPLP, TADTQTQVAPTPTMRMATAEDLPLPPPPALEDLPLP, MADTQTQVAPTPTMRMATAEDLPLPPPPAWRTCHCR, MADTQTQVAPTPTMRMATAEDLPLPPPPALEDLPLS, LADTQTQVAPTPTMRMATAEDLPLPPPPALEDLPLP	0.831646	X
XIRP2	A4UGR9	XIRP2_HUMAN	NATSSGMTEEFPPPPPDVLQTSVDVTAFSQSPELP	NATSSGMTEEFPPPPPDVLQTSVDVTAFSQSPELPR, NATSSGMTEEFPPPPPDVLQTSVDVTAFSQSPELPS	0.701809	X
TP53I13	Q8NBR0	P5I13_HUMAN	MAGPAEEAGAHCPESLWPLPPQVSPRVTYTRVSPGQ	MAGPAEEAGAHCPESLWPLPPQVSPRVTYTRVSPGQ	0.404884	X
FMN2	Q9NZ56	FMN2_HUMAN	LQGTEMLPPPPPPLPGAGIPPPPPLPGAGILPLPPL	LQGTEMLPPPPPPLPGASIPPPPPLPGAGILPLPPL	0.852642	X
FAT1	Q14517	FAT1_HUMAN	DEQTPLYSADPNAIDTDYYPGGYDIESDFPPPPEDF	DEQTPLYSADPNAIDTDYYPGGYDIESDFPPPPEDF	0.668046	X
LAMB3	Q13751	LAMB3_HUMAN	TYGDVATGCRACDCDFRGTEGP	TYGDVATGCRACDCDFRGTEGPAATRHQALPLPPWP	0.021753	X	X
NUTM2E	B1AL46	NTM2E_HUMAN	VVPVMAAQVVGGTQACEGGWSQGLPLPPPPPPAAQL	VVPVMAAQVVGGTQACEGGWSQGLPLPPPPPPAAQL	0.522319	X
AEBP1	Q8IUX7	AEBP1_HUMAN	PSETLEWPLPPPPSPGPEELPQEGGAPLSNNWQNPG	PSETLEWPLPPPPSPGPEELPQEGGAPLSNNWQNPG	0.94487	X
ZNF398	Q8TD17	ZN398_HUMAN	PEASEGQVTFTQLGSYPLPPPVGEQVFSCHHCGKNL	PEASEGQVTFTQLGSYPLPPPVGEQVFSCHHCGKNL	0.46148	X
CA6	P23280	CAH6_HUMAN	TYYSNFISHLANIKYPGQRTTLTGLDVQDMLPR	TYYSNFISHLANIKYPGQRTTLTGLDVQDMLPRPPS	0.252274	X
TNK2	Q07912	ACK1_HUMAN	TPVVDWDARPLPPPPAYDDVAQD	TPVVDWDARPLPPPPAYDDVAQERMTLRSAPSTAPS	0.751614	X
FHOD1	Q9Y613	FHOD1_HUMAN	GVPPPPPLPPPPPIKGPFPPPPPLPLAAPLPHSVPD	GVPPPPPLPPPPPIKGPFPPPPPLPLAAPLPHSVPD	0.791702	X
NUTM2G	Q5VZR2	NTM2G_HUMAN	AAQVAPIVSPGNAGPWPQGAHGEGSLAP	PLPPPPPPAAQLPPIVSQGNAGPWPQGAHGGAAWLP	0.698173	X
SYNPO2	Q9UMS6	SYNP2_HUMAN	TSPIADFPAPPPYSAVTPPPDAFSRGVSSPIAGPAQ	TSPIADFPAPPPYSAVTPPPDAFSRGVSSPIAGPAQ	0.777016	X
MAGED1	Q9Y5V3	MAGD1_HUMAN	DWPLPPDWPLPTDWPLPPDWIPADWPIPPDWQNLRP	DWPLPPDWPLPTDWPLPPDWIPADWPIPPDWQNLRP, DWPLPPDWPLPTDWPLPPDWIPADWPIPPDWLNLHP	0.476466	X
IFT52	Q9Y366	IFT52_HUMAN	LQLIQPQFETPLPTLQPAVFPPSFRELPPPPLEL	LQLIQPQFETPLPTLQPAVFPPSFRELPPPPLELSG, LQLIQPQSETPLPTLQPAVFPPSFRELPPPPLELFD, LQLIQPQFETPLPTLQPAVFPPSFRELPPPPLELFD, LQLIQPQFETPLPTLQPAVFPPSFRELPPPPLELFE	0.415896	X
MIA3	Q5JRA6	TGO1_HUMAN	GTRLPPPTHGPQEYPPPPAVRDLLPSGSRDEPPPA	GTRLPPPTHGPQEYPPPPAVRDLLPSGSRDEPPPAP	0.900588	X
MIA3	Q5JRA6	TGO1_HUMAN	PREYFIPGTRLPPPTHGPQEYPPPPAVRDLL	PREYFIPDTRLPPPTHGPQEYPPPPAVRDLLRQALV	0.830115	X
SOCS7	O14512	SOCS7_HUMAN	DDISGTLPTSVLVAPMGSSLQSFPLPPPPPPHAPDA	DDISGTLPTSVLVAPMGSSLQSFPLPPPPPPHAPDS	0.593253	X
AFDN	P55196	AFAD_HUMAN	ATPVAVSQPIRTDLPPPPPPPPVHYAGDFDGMSMDL	ATPVAVSQPIRTDLPPPPPPPPVHYAGDFDGMSMDL	0.861496	X
NOBOX	O60393	NOBOX_HUMAN	VPMEPKPDPFPQESPLDTFPEPPMLLTSDQTLAPTQ	VPMEPKPDPFPQESPLDTFPEPPMLLTSDQTLAPTQ	0.79828	X
MARVELD2	Q8N4S9	MALD2_HUMAN	THPTLHDSERAVSADPLPPPPLPLQPPFGPDFYSSD	THPILHDSERAVSADPLPPPPLPLQPPFGPDFYSSD	0.779966	X
SETD1B	Q9UPS6	SET1B_HUMAN	FPPPPEEPTATAAFGARDSGEFRRAPAPPPLPPAEP	FPPPPEEPTATAAFGARDSGEFRRAPAPPPLPPAEP	0.884836	X
LARP1	Q6PKG0	LARP1_HUMAN	SLIFAALKDSKVVEIVDEKVRRREEPEKWPLPPIV	SLIFAALKDSKVVEIVDEKVRRREEPEKWPLPPIVV	0.308915	X
NRXN2	Q9P2S2	NRX2A_HUMAN	LATGDSEILDLESELYLGGLPEGGRVDLPLPPEVWT	LATGDSEILDLESELYLGGLPEGGRVDLPLPPEVWT	0.258343	X
SHROOM3	Q8TF72	SHRM3_HUMAN	PVYSMDDFPPPPPHTVCEAQLDSEDPEGPRPSFNKL	PVYSMDDFPPPPPHTVCEAQLDSEDPEGPRPSFNKL	0.870458	X
WBP2	Q969T9	WBP2_HUMAN	SYMPSGAYVYPPPVANGMYPCPPGYPYPPPPPEFYP	SYMPSGAYVYPPPVANGMYPCPPGYPYPPPPPEFYP	0.296609	X
GJD2	Q9UKL4	CXD2_HUMAN	MGEWTILERLLEAAVQQH	MGEWTILERLLEAAVQQHHYDRSYPVDCGGDLPDPP	0.0342917	X
PITPNM2	Q9BZ72	PITM2_HUMAN	PYSHDEGCLSSSQDHIPLAA	PYSHDEGCLSSSQDHIPLAASRCWPPPPRSIRRQLP	0.271883	X
TP53BP2	Q13625	ASPP2_HUMAN	EEPNPEAPHVLDVYLEEYPPYPPPPYPSGEPEGPGE	EEPNPEAPHVLDVYLEEYPPYPPPPYPSGEPEGPGE	0.832164	X
FYB1	O15117	FYB1_HUMAN	SGSGGIFPPPPDDDIYDGIEEEDADDGFPAPPKQLD	SGSGGIFPPPPDDDIYDGIEEEDADDGFPAPPKQLD	0.778825	X
PWWP2B	Q6NUJ5	PWP2B_HUMAN	AGSLPPYPPYFEGAPFPHPLWLRDTYK	PPLAAGSLPPYPPYFEGAPFPHPLWLRDTYNCGCRS	0.481852	X
PEX12	O00623	PEX12_HUMAN	DWWYSSENQETIKSLTALPTPPPPVHLDYNSDSPLL	DWWYSSENQETIKSLTALPTPPPPVHLDYNSDSPLL	0.319205	X
FBLIM1	Q8WUP2	FBLI1_HUMAN	PPPVLDGEDVLPDLDLLPPPPPPPPVLLPSEEEAPA	PPPVLDGEDVLPDLDLLPPPPPPPPVLLPSEEEAPA	0.818584	X
AEBP1	Q8IUX7	AEBP1_HUMAN	EHELGEPEFRYTAGIHGNEVLGRE	EHELGEPEFRYTAGIHGNEVLGRELLRCSCSTCAVN, EHELGEPEFRYTAGIHGNEVLGRELFYCSCSTCAVS	0.285406		X
MID2	Q9UJV3	TRIM1_HUMAN	ILSGLPAPDFIDYPERQECNCRPQESPYVSGMKTCH	ILSGLPAPDFIDYPERQECNCRLKNPLMFLG, ILSGLPAPDFIDYPERQECNCRPQESPYVSGMKTCH, ILSGLPAPDFIDYPERQECNCRPQESLMFLG	0.240277		X
PNPLA8	Q9NP80	PLPL8_HUMAN	AMHECKCLWPDVPLECIVSLGTGRYESDVRNTVTYT	AMHECKCLWPDVPLECIVSLGTGRYESDVRNTVTYT	0.175376	X	X
REXO1L1P	Q8IX06	GOR_HUMAN	NGYPFPHPERPGGAVLFTGQGKGPGDSSCRVCCRCG	NGYPFPHPERPGGAVLFTGQGKGPGDSSCRVCCRCG	0.317396		X
TGM4	P49221	TGM4_HUMAN	FTSFQYPEFSIELPNTGRIGQLLVCNCIFKNTLAIP	FTSFQYPEFSIELPNTGRIGQLLVCNCIFKNTLAIP	0.0772192		X
KANSL2	Q9H9L4	KANL2_HUMAN	QLKERRMLATDGAAQQAHTTRSSQRCLAFVDDVRCS	QLKERRMLATDGAAQQAHTTRSSQRCLAFVDDVRCA	0.36845		X
OLIG3	Q7RTU3	OLIG3_HUMAN	LPCPCTICQMPPPPHLSALSTANMARLSAESKDLLK	LPCPCTICQMPPPPHLSALSTANMARLSAESKDLLK, LPCPCTICQMPPPPHLSALSTANMARMSAESKDLLK, HWAGLPCPCTICQMPPPPHLSALSTANMARLSAESK	0.405325		X
FAT3	Q8TDW7	FAT3_HUMAN	QDQLPPPLPEDFPDQYEALPPSQP	QDQLPPPLPEDFPDQYEALPPSQPSPWPAH, QDQLPPPLPEDFPDQYEPCHRPSLSPWPAH	0.824376
TJAP1	Q5JTD0	TJAP1_HUMAN	PEEELPLPAFEKLNPYPTPSPPHPLYPGRRVIEFSE	PEEELPLPAFEKLNPYPTPSPPHPLYPGRRVIEFSD	0.70252
FAM219B	Q5XKK7	F219B_HUMAN	IPDDEDLDLIPPKPMASSTCSCCWCCLGDSSSC	IPDDEDLDLIPPKPMASSTCSCCWCCLGDSSSCPSS	0.261777		X
DMXL2	Q8TDJ6	DMXL2_HUMAN	LARKSVVEGTAISDDVFCSPTVIQDGGLFEAAHVLS	LARKSVVEGTAISDDVFCSPTVIQDGGLFEAAHVLS	0.254382		X
ZBED4	O75132	ZBED4_HUMAN	FSLAPMDSLKAECRYCGCAISRGKKGDVGTSCLMRH	FSLAPMDSLKVECRYCGCAISRGKKGDVGTSCLMRH	0.229878		X
ZNF490	Q9ULM2	ZN490_HUMAN	NLETPTGLKPCDCSVCGEVFMHQVSLNRHMRSHTEQ	NLETPTGLKPCGCSVCGEVFMHQVSLNRHMRSHTEQ, NLETPTGLKPCNCSVCGEVFMHQVSLNRHMRSHTEQ	0.294435		X
NUP155	O75694	NU155_HUMAN	LPPELVEQFGHMQCNCMMGVFPPISRAWLTIDSDIF	LPPELVEQFGHMQCNCMMGVFPPISRAWLTIDSDIF	0.136714		X
GPR155	Q7Z3F1	GP155_HUMAN	ILAQEEEQYLQSGDQQLTR	ILAQEEEQYLQSGDQQLTRMCCCVYFSSLACSLIFP	0.177696		X
ZNF33A	Q06730	ZN33A_HUMAN	QGDVIGIPFNVDVSSFPSRKMFCQCDSCGMSFNTVS	QGDVIGIPFNVDVSSFPSRKMFCQCDSCGMSFNTVS	0.174987		X
SLC17A8	Q8NDX2	VGLU3_HUMAN	RPSPPLCDCHCCGLPKRYII	RPSPPLCDCHCCGLPKRYIILS	0.139585		X
SUPT20H	Q8NEM7	SP20H_HUMAN	DAEELPPILVDLLEKSQVNIFHCGCVIAEIRDYR	DAEELPPILVDLLEKPQVNIFHCGCVIAEIRDYR	0.105538		X
PTPRU	Q92729	PTPRU_HUMAN	TEITTNISAPSFDYADMPSPLGESENTI	TEITTNISAPSFDYADMPSPLGESENTIPCYCVRHT	0.428978		X
OCSTAMP	Q9BR26	OCSTP_HUMAN	AQAQATHLLAPPPTWLLQAAQLR	AQAQATHLLAPPPTWLLQAAQLRCHRRSC	0.120166		X
DDAH2	O95865	DDAH2_HUMAN	DHPYASLTLPDDAAADCLFLRPG	DHPYASLTLPDDAAADCLFLRPGCWCAAFPPAPWWS	0.227254	X	X
FAM219B	Q5XKK7	F219B_HUMAN	IPDDEDLDLIPPKPMASSTCSCCWCCLGDSSSCTLQ	IPDDEDLDLIPPKPMASSTCSCCWCCLGDSSSCTLQ	0.245436		X
PKD1	P98161	PKD1_HUMAN	LSEINLSGNPFECDCGLAWLPRWAEEQQVRVVQPEA	LSEINLSGNPFECDCGLAWLPRWPEEQQVRVVQPEA	0.155712		X
FHDC1	Q9C0D6	FHDC1_HUMAN	PPPAPPPPPPPPPPSPPCSCSREECPSSPPPPPPPP	PPPAPPPPPPPPPPSPPCSCSREECPSSPPPPPPPP	0.873397		X
MUC3A	Q02505	MUC3A_HUMAN	CACLPGFSGDRCQLQTR	CACLPGFSGDRCQLQTRPEWGSVGWPQMPVPEHLLP	0.287748		X
		NA_1		STCDPPSCPGCASGLWPLPPPPPPPGSLSHVPGRVS, STCDPPSCPGCASGLWPLPPPPLPPGSPEPRAGTRE		X	X
		NA_2		LGVVSSWLEGAVLEQIGPLPEPPPAADVAEPEHL		X
		NA_3		TCAWCGALDFPMVETWGVGLPPPPSLGGIQTQSRAR		X	X
		NA_4		ETAEYQSLCPHGRLPGAEWWPEPPA		X	X
		NA_5		WAIPGTNRARPLGSEWWGPPWAVHPRPADFPCPPGA		X
		NA_6		QYDNTLGILDRGPGWESSGGCTCVFPAPP		X
		NA_7		WVPHLWPCSTQTTPPCGCSRSWRSWPQPPTRLSSPS		X
		NA_8		AFYAFPPPPPRLFSRPPQVFPAAASCRHCQGFLCRF, AFYAFPPPPPRLFSPSPQVFPAAASCRHCQGFLCRF		X	X
		NA_9		YGLPLPPAQVLDAHTLWSVFPYPPPHCLLP		X
		NA_10		QLLQAMRTWPPIPRWY		X
		NA_11		MANSACSCWASPWPCWAGWVWWPAPPSRSGR		X	X
		NA_12		LLAAACGACYGCPGGWGHPGLEGGWSQGLPLPPPPR		X	X
		NA_13		FLPPPPSTTRKCCCHTSVTSVKVHCWPIIQPPRARA		X	X
		NA_14		PPLPQPASHFPPPPPPPPLPPPPPPLACVAP		X
		NA_15		PSVWFGGRSMCSCSPSWRCTRVPACWPSPPPAC		X	X
		NA_16		LSAMVEVPAYVLPGCCCNICRGAIPWPLPSSWVAVP			X
		NA_17		EEARWCACGTRTWPLPTPAAPRASQRWAAVW		X	X
		NA_18		CNCNNCCNNLHHDIERFKAIKACLVVIQKLSSQKLG			X
		NA_19		PLPEPEPLPLPLEVSAASCRRCAFLNSCPCVLGRGR			X
		NA_20		MSEYTRVSEVENKELVEFHQKTMGWCCCPQLQPSFH			X
		NA_21		YLSEPSSVAHYCCCCSCFGFPTQIHFSIDSPVTH			X
		NA_22		RGWECYCAYPPRGSTCGMPWTAQYVARTLRHSVWQN			X
		NA_23		VEQMCHCSPREGCGWPGPHSWCNSWPGSPGHSRSHL			X
		NA_24		LPDFDPVGMTPSSAPPWLPMAGCSCWLC			X
		NA_25		PFSLSECCSCHCGHGRYPVPVEVHGEAAGEAGQEGG			X
		NA_26		CACWKVSAMNLITLYFSAFKDLFTFGVGWRFGGGKVV			X
		NA_27		LHQAAVAELPPPVGPATRSGCHCVYHDAGVSPCVPP			X
		NA_28		LPQARPLPSGCCWCPGLGEAGSSREPCLGAELPAWP, LPQARPLPSPGCCWCPGLGEAGSSRACLGAELPAWP		X	X
		NA_29		DADLYCQNMNSGTWCLCSPRRRVPSWPH			X

## Sheet: Putative interaction partners
Gene	UniProt Acession Number	Uniprot Name	Mapped Sequence	Sequence in library	IUPRED	Known Interaction?	Known binding site?	Reference		Native proline-rich motifs exploit sequence context to target actin-remodeling Ena/VASP protein ENAH
ABI1	Q8IZP0	ABI1_HUMAN	FDDFPPPPPPPPVDYEDEEAAVVQYNDPYADGDPAW	FDDFPPPPPPPPVDYEDEEAAVVQYNDPYADGDPA, FDDFPPPPPPPPVDYEDEEAAVVQFNDPYADGDPAW, FDDFPPPPPPPPVDYEDEEAAVVQYNDPYADGDPAW, FDDFPPPPPPPPVDYEDEEVQ, FDDFPPPPPPHQWIMKMRRLQ	0.688517	X	X	Tani K, Sato S, Sukezane T, Kojima H, Hirose H, Hanafusa H, Shishido T. 2003. Abl interactor 1 promotes tyrosine 296 phosphorylation of mammalian enabled (Mena) by c-Abl kinase. The Journal of Biological Chemistry 278:21685–21692.		Hwang et al.
ABI3	Q9P2A4	ABI3_HUMAN	LSPPPPDEELPLPLDLPPPPPLDGDELGLPPPPPG	LSPPPPDEELPLPLGLPPPPPLDGDELGLPPPPPG	0.900761	X		Chen XJ, Squarr AJ, Stephan R, Chen B, Higgins TE, Barry DJ, Martin MC, Rosen MK, Bogdan S, Way M. 2014. Ena/VASP proteins cooperate with the WAVE complex to regulate the actin cytoskeleton. Developmental Cell 30:569–584.
AFDN	P55196	AFAD_HUMAN	ATPVAVSQPIRTDLPPPPPPPPVHYAGDFDGMSMDL	ATPVAVSQPIRTDLPPPPPPPPVHYAGDFDGMSMDL	0.861496					Description:	List of MassTitr hits that could be putative interactors of ENAH in the cell based on their disorder propensity and localization.
ENAH	Q8N8S7	ENAH_HUMAN	DRLKQDILDEMRKELTKLKEELIDAIRQELSKSNTA	DRLKQDILDEMRKELTKLKEELIDAIRQELSKSNTA	0.584718	X	X	Riquelme DN, Meyer AS, Barzik M, Keating AE, Gertler FB. 2015. Selectivity in subunit composition of Ena/VASP tetramers. Bioscience Reports 35:e00246.
EVL	Q9UI08	EVL_HUMAN	DAFDLDRMKQEILEEVVRELHKVKEEIIDAIRQELS	DAFDLDRMKQEILEEVVRELHKVKEEIIDAIRQELS, DAFDLDRMKQEILEEVVRELHKVKEEIIDAIRQELN	0.531995	X	X	Riquelme DN, Meyer AS, Barzik M, Keating AE, Gertler FB. 2015. Selectivity in subunit composition of Ena/VASP tetramers. Bioscience Reports 35:e00246.
FAT1	Q14517	FAT1_HUMAN	DEQTPLYSADPNAIDTDYYPGGYDIESDFPPPPEDF	DEQTPLYSADPNAIDTDYYPGGYDIESDFPPPPEDF	0.668046	X	X	Moeller MJ, Soofi A, Braun GS, Li X, Watzl C, Kriz W, Holzman LB. 2004. Protocadherin FAT1 binds Ena/VASP proteins and is necessary for actin dynamics and cell polarization. The EMBO Journal 23:3769–3779.
FAT3	Q8TDW7	FAT3_HUMAN	QDQLPPPLPEDFPDQYEALPPSQP	QDQLPPPLPEDFPDQYEALPPSQPSPWPAH, QDQLPPPLPEDFPDQYEPCHRPSLSPWPAH	0.824376	X	X	Krol A, Henle SJ, Goodrich LV. 2016. Fat3 and Ena/VASP proteins influence the emergence of asymmetric. Development 143:2172–2182.
FBLIM1	Q8WUP2	FBLI1_HUMAN	PPPVLDGEDVLPDLDLLPPPPPPPPVLLPSEEEAPA	PPPVLDGEDVLPDLDLLPPPPPPPPVLLPSEEEAPA	0.818584	X	X	Zhang Y, Tu Y, Gkretsi V, Wu C. 2006. Migfilin interacts with vasodilator-stimulated phosphoprotein (VASP) and regulates VASP localization to cell-matrix adhesions and migration. The Journal of Biological Chemistry 281:12397–12407.
FHDC1	Q9C0D6	FHDC1_HUMAN	PPPAPPPPPPPPPPSPPCSCSREECPSSPPPPPPPP	PPPAPPPPPPPPPPSPPCSCSREECPSSPPPPPPPP	0.873397
FHOD1	Q9Y613	FHOD1_HUMAN	GVPPPPPLPPPPPIKGPFPPPPPLPLAAPLPHSVPD	GVPPPPPLPPPPPIKGPFPPPPPLPLAAPLPHSVPD	0.791702
FMN2	Q9NZ56	FMN2_HUMAN	LQGTEMLPPPPPPLPGAGIPPPPPLPGAGILPLPPL	LQGTEMLPPPPPPLPGASIPPPPPLPGAGILPLPPL	0.852642
FYB1	O15117	FYB1_HUMAN	SGSGGIFPPPPDDDIYDGIEEEDADDGFPAPPKQLD	SGSGGIFPPPPDDDIYDGIEEEDADDGFPAPPKQLD	0.778825	X	X	Krause M, Sechi AS, Konradt M, Monner D, Gertler FB, Wehland J. 2000. Fyn-binding protein (Fyb)/SLP-76-associated protein (SLAP), Ena/vasodilator-stimulated phosphoprotein (VASP) proteins and the Arp2/3 complex link T cell receptor (TCR) signaling to the actin cytoskeleton. The Journal of Cell Biology 149:181–194.
IFT52	Q9Y366	IFT52_HUMAN	LQLIQPQFETPLPTLQPAVFPPSFRELPPPPLEL	LQLIQPQFETPLPTLQPAVFPPSFRELPPPPLELSG, LQLIQPQSETPLPTLQPAVFPPSFRELPPPPLELFD, LQLIQPQFETPLPTLQPAVFPPSFRELPPPPLELFD, LQLIQPQFETPLPTLQPAVFPPSFRELPPPPLELFE	0.415896
LPP	Q93052	LPP_HUMAN	KQPGGEGDFLPPPPPPLDDSSALPSISGNFPPPPPL	KQPGGEGDFLPPPPPPLDDSSALPSISGNFPPPPPL, KQPGGEGDFLPPPPPPLDDSSALPSISSNFPLHHLF	0.852844	X		Petit MM, Fradelizi J, Golsteyn RM, Ayoubi TA, Menichi B, Louvard D, Van de Ven WJ, Friederich E. 2000. LPP, an actin cytoskeleton protein related to zyxin, harbors a nuclear export signal and transcriptional activation capacity. Molecular Biology of the Cell 11:117–129.
MAGED1	Q9Y5V3	MAGD1_HUMAN	DWPLPPDWPLPTDWPLPPDWIPADWPIPPDWQNLRP	DWPLPPDWPLPTDWPLPPDWIPADWPIPPDWQNLRP, DWPLPPDWPLPTDWPLPPDWIPADWPIPPDWLNLHP	0.476466
MARVELD2	Q8N4S9	MALD2_HUMAN	THPTLHDSERAVSADPLPPPPLPLQPPFGPDFYSSD	THPILHDSERAVSADPLPPPPLPLQPPFGPDFYSSD	0.779966
MIA3	Q5JRA6	TGO1_HUMAN	GTRLPPPTHGPQEYPPPPAVRDLLPSGSRDEPPPA	GTRLPPPTHGPQEYPPPPAVRDLLPSGSRDEPPPAP	0.900588
MIA3	Q5JRA6	TGO1_HUMAN	PREYFIPGTRLPPPTHGPQEYPPPPAVRDLL	PREYFIPDTRLPPPTHGPQEYPPPPAVRDLLRQALV	0.830115
NFE2	Q16621	NFE2_HUMAN	PPPPTTYCPCSIHPDSGFPLPPPPYELPASTSHVPD	PPPPTTYCPCSIHPDSGFPLPPPPYEPQHPHPMSQH, PPPPTTYCPCSIHPDSGFPLPPPPYELPASTSHVPD, PPPPTTYCPCSIHPDSGFPLPPPPCELPASTSLVPD, PPPPTTYCPCSIHPDSGFPLPPPPYELPASTSHVPE, PPPPTTYCPCSIHPNSGFPLPPPPYELPASTSHVPD, PPPPTAYCPCSIHPDSGFPLPPPPYELPASTSHVPD	0.616585
PCARE	A6NGG8	PCARE_HUMAN	AAKSEELSCEMEGNLEHLPPPPMEVLMDKSFASLES	AAKSEELSCEMEGNLEHLPPPPMEVLMDKSFASLES, AAKSEELSCEMEGNLEHLPPPPMEVLMDKSFASWKP, AAKSEELSCEMEGNLEHLPPPPMEVLMDESFASLES	0.695107	X		Corral-Serrano JC, Lamers IJC, van Reeuwijk J, Duijkers L, Hoogendoorn ADM, Yildirim A, Argyrou N, Ruigrok RAA, Letteboer SJF, Butcher R, van Essen MD, Sakami S, van Beersum SEC, Palczewski K, Cheetham ME, Liu Q, Boldt K, Wolfrum U, Ueffing M, Garanto A, Roepman R, Collin RWJ. 2020. PCARE and WASF3 regulate ciliary F-actin assembly that is required for the initiation of photoreceptor outer segmen…
SHROOM3	Q8TF72	SHRM3_HUMAN	PVYSMDDFPPPPPHTVCEAQLDSEDPEGPRPSFNKL	PVYSMDDFPPPPPHTVCEAQLDSEDPEGPRPSFNKL	0.870458	X	X	Plageman TF, Chung MI, Lou M, Smith AN, Hildebrand JD, Wallingford JB, Lang RA. 2010. Pax6-dependent Shroom3 expression regulates apical constriction during lens placode invagination. Development 137:405–415.
SOCS7	O14512	SOCS7_HUMAN	DDISGTLPTSVLVAPMGSSLQSFPLPPPPPPHAPDA	DDISGTLPTSVLVAPMGSSLQSFPLPPPPPPHAPDS	0.593253
SYNPO2	Q9UMS6	SYNP2_HUMAN	TSPIADFPAPPPYSAVTPPPDAFSRGVSSPIAGPAQ	TSPIADFPAPPPYSAVTPPPDAFSRGVSSPIAGPAQ	0.777016
TENM1	Q9UKZ4	TEN1_HUMAN	GSTQDVQSSPHNQFTFRPLPPPPPPPHACTCARKPP	GSTQDVQSSPHNQFTFRPLPPPPPPPHACTCARKPP	0.76658
TJAP1	Q5JTD0	TJAP1_HUMAN	PEEELPLPAFEKLNPYPTPSPPHPLYPGRRVIEFSE	PEEELPLPAFEKLNPYPTPSPPHPLYPGRRVIEFSD	0.70252
TNK2	Q07912	ACK1_HUMAN	TPVVDWDARPLPPPPAYDDVAQD	TPVVDWDARPLPPPPAYDDVAQERMTLRSAPSTAPS	0.751614
TP53BP2	Q13625	ASPP2_HUMAN	EEPNPEAPHVLDVYLEEYPPYPPPPYPSGEPEGPGE	EEPNPEAPHVLDVYLEEYPPYPPPPYPSGEPEGPGE	0.832164
TP53I13	Q8NBR0	P5I13_HUMAN	MAGPAEEAGAHCPESLWPLPPQVSPRVTYTRVSPGQ	MAGPAEEAGAHCPESLWPLPPQVSPRVTYTRVSPGQ	0.404884
XIRP1	Q702N8	XIRP1_HUMAN	MADTQTQVAPTPTMRMATAEDLPLPPPPALEDLPLP	MADTQTQVAPTPTMRMATAEDLPLPPPPALEDLPLP, TADTQTQVAPTPTMRMATAEDLPLPPPPALEDLPLP, MADTQTQVAPTPTMRMATAEDLPLPPPPAWRTCHCR, MADTQTQVAPTPTMRMATAEDLPLPPPPALEDLPLS, LADTQTQVAPTPTMRMATAEDLPLPPPPALEDLPLP	0.831646	X	X	van der Ven PFM, Ehler E, Vakeel P, Eulitz S, Schenk JA, Milting H, Micheel B, Fürst DO. 2006. Unusual splicing events result in distinct Xin isoforms that associate differentially with filamin c and Mena/VASP. Experimental Cell Research 312:2154–2167.
XIRP2	A4UGR9	XIRP2_HUMAN	NATSSGMTEEFPPPPPDVLQTSVDVTAFSQSPELP	NATSSGMTEEFPPPPPDVLQTSVDVTAFSQSPELPR, NATSSGMTEEFPPPPPDVLQTSVDVTAFSQSPELPS	0.701809
ZC3H12A	Q5D1E8	ZC12A_HUMAN	GHFSVPADYPPAPPAFPPREYWSEPYPLPPPTSVLQ	GHFSVPADYPPAPPAFPPREYWSEPYPLPPPTSVLQ	0.547806
ZYX	Q15942	ZYX_HUMAN	ALGGAFPPPPPPIEESFPPAPLEEEIFPSPPPPPEE	ALGGAFPPPPPPIEESFPPAPLEEEIFPSPPPPPEE, ALGGAFPPPPPPIEESLPPAPLEEEIFPSPPPPPEE, ALGGAFPPPPPPIEESFPPAPLEEEIFPSPPPLRRS, ALGGAFPPPPPPIEESFPPAPLKEEIFPSPPPPPEE, ALGGAFPPPPPPIDESFPPAPLEEEIFPSPPLLRRS, ALGGALPPPPPPIEESFPPAPLEEEIFPPRRLLRSF	0.899902	X	X	Drees B, Friederich E, Fradelizi J, Louvard D, Beckerle MC, Golsteyn RM. 2000. Characterization of the interaction between zyxin and members of the Ena/vasodilator-stimulated phosphoprotein family of proteins. The Journal of Biological Chemistry 275:22503–22511.
NHSL1	Q5SYE7	NHSL1_HUMAN	ADRSPFLPPPPPVTDCSQGSPLPHSPVFPPPPPEAL	ADRSPFLPPPPPVTDCSQGSPLPHSPVFPPPPPEAL, ADRSPFLPPPPPVTGCSQGSPLPHSPVFPPPPPEAL	0.730698
KIAA1522	Q9P206	K1522_HUMAN	PPAPEEQDLSMADFPPPEEAFFSVASPEPAGPSGSP	PPAPEEQDLSMADFPPPVEAFFSVASPEPAGPSGSP, PPAPEEQDLSMADFPPPEEAFFSVASPEPAGPSGSP, PPAPEEQDLSMADFPPPEEAFFSVASPEPAGLQALH	0.903251
