# Supplementary material for: Native proline-rich motifs exploit sequence context to target actin-remodeling Ena/VASP protein ENAH
Source: eLife. 2022 Jan 25;11:e70680. doi: 10.7554/eLife.70680 (PMC8789275; doi:10.7554/eLife.70680)
Supplement: Supplementary file 5. [file elife-70680-supp5.docx]

**Supplementary File 5. Comparison of affinities of single- and dual-motif peptides for monomeric ENAH WT vs. ENAH R47A.**a

| **Name** | **Sequence** | **WT KD (μM)** | **R47A KD (μM)** |
| --- | --- | --- | --- |
| PCARE | AAKSEELSCEMEGNLEH**LPPPP**MEVLMDKSFASLES | 0.18 .04 | 0.32 .04 |
| LPP** | KQPGGEGDF**LPPPP**PPLDDSSALPSISGN**FPPPP**PL | 4.7 2.4 | 60.1 6.7 |
| ZYX** | ALGGA**FPPPP**PPIEES**FPPAP**LEEEI**FPSPP**PPPEE | 5.0 1.0 | 27.3 2.6 |
| ActA | GFNAPATSEPSSFE**FPPPP**TEDELEIIRETASSLDS | 4.9 0.5 | 6.6 2.4 |
| NHSL1** | ADRSPF**LPPPP**PVTDCSQGSPLPHSPV**FPPPP**PEAL | 9.7 2.5 | 51.5 10.0 |

aAffinities determined by BLI as described in the methods. Errors reported as the standard deviation of three replicates.

** Statistically significant differences in affinity between WT and R47A with p < 0.01.
