# Supplementary material for: Native proline-rich motifs exploit sequence context to target actin-remodeling Ena/VASP protein ENAH
Source: eLife. 2022 Jan 25;11:e70680. doi: 10.7554/eLife.70680 (PMC8789275; doi:10.7554/eLife.70680)
Supplement: Table 1—source data 1. [file elife-70680-table1-data1.xlsx]

## Sheet: Read Me
Raw data for Table 1 in Native proline-rich motifs exploit sequence context to target actin-remodeling Ena/VASP protein ENAH
3 separate BLI experiments were performed, and steady state analysis was performed for each curve at a given concentration of ENAH EVH1 to obtain values to fit a one-site specific to binding model in Prism to obtain KD's.
Steady state values are reported as the wavelength shift (response, nm) of the BLI experiment. Data in Table 1 is reported as the average KD and standard deviation
Additional details on BLI data collection and steady state analysis can be found in co-submission manuscript A distributed residue network permits conformational binding specificity in a conserved family of actin remodelers
Values for mean and standard deviation of KD's are given in format below:
AVERAGE	STD DEV

## Sheet: Table 1
	WT ENAH EVH1
	LPP Duplicated			NHSL1 Duplicated
Concentration (μM)	Rep 1	Rep 2	Rep 3	Rep 1	Rep 2	Rep 3
80	0.8095	0.5767	0.5183	0.7304	0.5452	0.4451					Note: Raw data for WT ENAH EVH1 against LPP and NHSL1 FP4 truncations can be found in Source Data - Figure 3
60	0.7693	0.5147	0.4355	0.6607	0.4583	0.3981
30	0.6611	0.492	0.4385	0.5171	0.3901	0.3204
15	0.536	0.4339	0.3102	0.3855	0.3018	0.2279
7.5	0.4311	0.3145	0.2262	0.2576	0.1857	0.163
3.75	0.3255	0.2112	0.1559	0.1662	0.099	0.1012
1.875	0.2185	0.147	0.09458	0.1035	0.06033	0.04384
0	0	0	0	0	0	0
KD (μM)	6.875	6.453	10.48	18.38	18.47	18.84
Average and SD	7.936	2.21325		18.5633	0.26163
95% Confidence Interval	[2.4709, 13.4011]			[17.954, 19.246]
	ENAH R47A EVH1
	LPP										NHSL1
	FP4 1			FP4 2				Duplicated			FP4 1			FP4 2			Duplicated
Concentration (μM)	Rep 1	Rep 2	Rep 3	Rep 1	Rep 2	Rep 3*	Rep 4	Rep 1	Rep 2	Rep 3	Rep 1	Rep 2	Rep 3	Rep 1	Rep 2	Rep 3	Rep 1	Rep 2	Rep 3
80	0.3584	0.3285	0.1616	0.3005	0.2855	0.1363	0.319881	0.4941	0.4691	0.3462	0.2154	0.2033	0.1468	0.3361	0.3772	0.1815	0.4199	0.3794	0.1815
60	0.3028	0.2955	0.2454	0.2556	0.2485	0.1101	0.274897	0.4495	0.4252	0.2985	0.1793	0.1746	0.1172	0.2998	0.3303	0.1662	0.3537	0.3237	0.1662
30	0.2023	0.1927	0.09626	0.1685	0.1558	0.07927	0.175387	0.2962	0.2798	0.1934	0.1054	0.1045	0.07789	0.204	0.2224	0.1001	0.2326	0.2103	0.1001
15	0.1222	0.1146	0.06416	0.09684	0.08936	0.05494	0.104524	0.1823	0.1683	0.1269	0.05914	0.05894	0.04575	0.1217	0.136	0.06459	0.1389	0.1237	0.06459
7.5	0.07105	0.05968	0.03765	0.05354	0.04713	0.03082	0.057366	0.1036	0.09175	0.08508	0.03458	0.03623	0.02642	0.07389	0.07927	0.04028	0.07621	0.07262	0.04028
3.75	0.03851	0.03503	0.01747	0.0307	0.02986	0.01383	0.033604	0.0569	0.05177	0.04555	0.02274	0.02587	0.01292	0.04447	0.04499	0.02551	0.04561	0.03741	0.02551
1.875	0.02878	0.02438	0.009547	0.02555		0.007842	0.019963	0.03646	0.033	0.0215	0.02256	0.02161	0.01099	0.03248	0.03005	0.01652	0.03392	0.02489	0.01652
0	0	0	0	0	0	0	0	0	0	0	0	0	0	0	0	0	0	0	0
KD (μM)	61.77	60.86	61.99	69.93	80.49	45.99	72.57	52.28	56.15	51.38	111.1	87.17	80.76	48.79	53.13	56.94	68.25	69.72	56.94
Average and SD	61.54	0.599083		74.33	5.4956			53.27	2.53442		93.01	15.9909		52.9533	4.07787		64.97	6.99292
95% Confidence Interval	[60.0, 63.0]			[60.6, 88.0]				[47.1, 59.5]			[53.3, 132.8]			[42.8, 63.1]			[47.6, 82.4]
	*Replicate omitted due to being an outlier. However its inclusion does not change any statistically significant conclusions.
